# Supplementary material
Source: publisher figshare collection journal article supplement (https://acs.figshare.com/ndownloader/files/26262152)
Supplement: Supplementary file 1 [file 26262152]

## Supporting Information

Computational and functional mapping of human and rat  $\alpha 6\beta 4$  nicotinic acetylcholine receptors reveals species-specific ligand-binding motifs

Arik J. Hone\*, Quentin Kaas, Ireland Kearns, Fuaad Hararah, Joanna Gajewiak, Sean Christensen, David J. Craik, and J. Michael McIntosh\*

## Table of Contents

### Supporting Information

Figure 1: Molecular models of the interactions of PeIA Ser<sup>9</sup> with human or rat  $\alpha 6\beta 4$  nAChRs.

Figure 2. Chromatographic analysis of peptide purity by RP-HPLC.

Table 1. Quantitative analysis of peptide yield, purity, and mass.

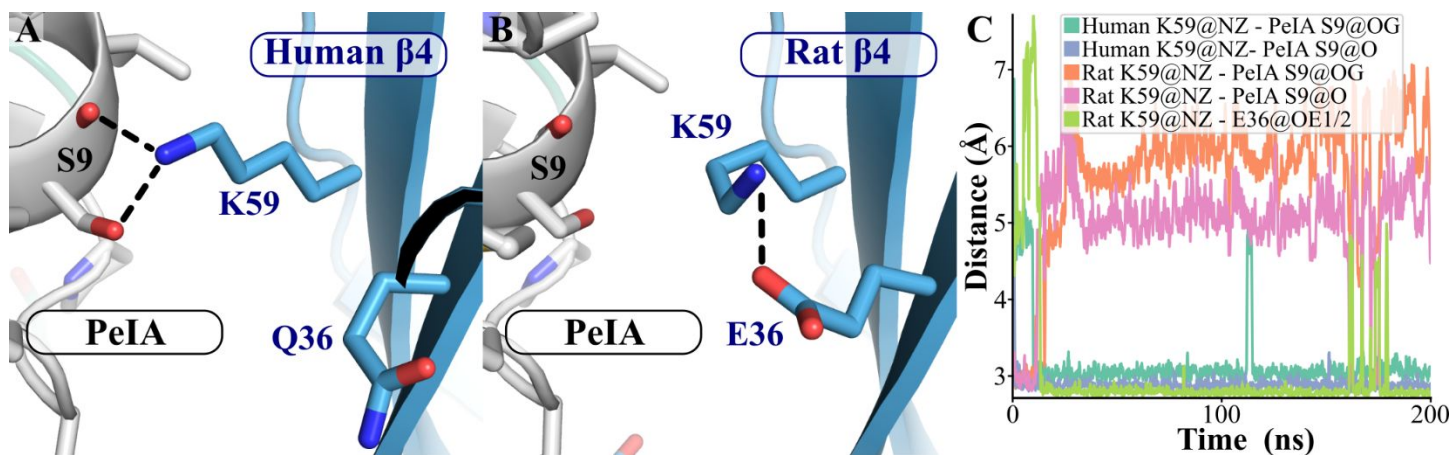

**Figure 1.** Molecular models of the interactions of PeIA Ser<sup>9</sup> with human or rat  $\alpha 6\beta 4$  nAChRs. (A,B) Molecular models of the interactions between Ser<sup>9</sup> and human  $\beta 4$  residues (A) or rat  $\beta 4$  residues (B). (C) Evolution of several distances between atoms potentially forming hydrogen bonds during the 200 ns molecular dynamics simulations of the human and rat receptors. The molecular models shown in (A,B) correspond to those described in Figure 1. The inter atom distances monitored in (C) are considered representative of hydrogen bonding if they are under 3.2 Å.

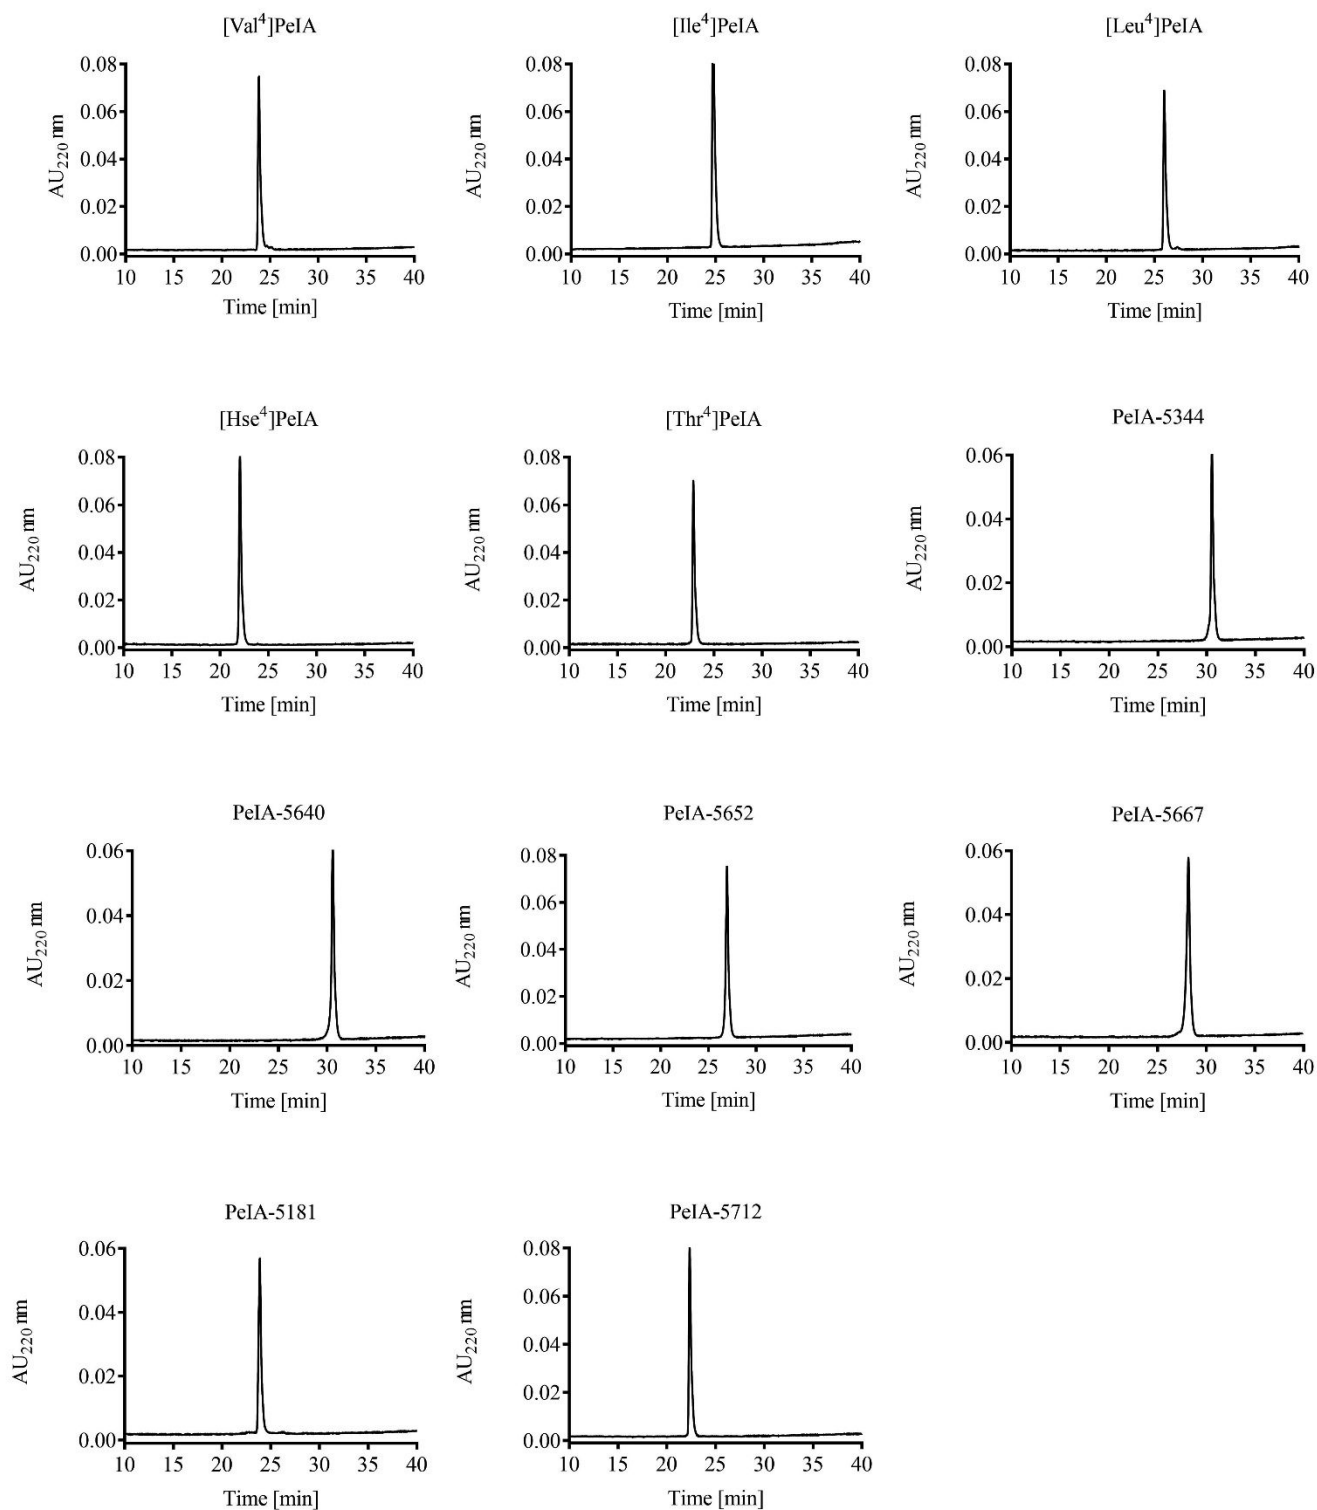

**Figure 2.** RP-HPLC chromatograms showing the purity of synthesized peptides. The solvent gradient used for all peptides was 10% to 50% B60 in 40 min and resolved on an analytical C18-column (Vydac, 5  $\mu$ M, 250x4.6 mm) (solvent A: 0.1% trifluoroacetic acid in water; solvent B60: 60% acetonitrile 0.092% trifluoroacetic acid, 40% water). Retention times and purity values are provided in Table 1.

**Table 1. Retention Time, Yield, Purity, and Mass Spectrometry for Synthetic Peptides<sup>a</sup>**

|                         | retention time (min) | % yield | % purity | calculated M <sup>+</sup> (Da) | observed M <sup>+</sup> (Da) |
|-------------------------|----------------------|---------|----------|--------------------------------|------------------------------|
| peptide                 |                      |         |          |                                |                              |
| [Hse <sup>4</sup> ]PeIA | 22.0                 | 77      | 99       | 1665.67                        | 1665.71                      |
| [Thr <sup>4</sup> ]PeIA | 22.9                 | 16      | 99       | 1665.67                        | 1665.75                      |
| [Val <sup>4</sup> ]PeIA | 23.8                 | 25      | 99       | 1663.69                        | 1663.68                      |
| [Ile <sup>4</sup> ]PeIA | 25.1                 | 67      | 99       | 1677.71                        | 1677.75                      |
| [Leu <sup>4</sup> ]PeIA | 26.0                 | 93      | 99       | 1677.71                        | 1677.76                      |
| PeIA-5344               | 30.5                 | 77      | 99       | 1771.74                        | 1771.70                      |
| PeIA-5640               | 30.6                 | 87      | 99       | 1771.74                        | 1771.73                      |
| PeIA-5652               | 28.4                 | 79      | 99       | 1748.72                        | 1748.71                      |
| PeIA-5667               | 28.2                 | 67      | 99       | 1748.72                        | 1748.71                      |
| PeIA-5181               | 23.9                 | 64      | 97       | 1704.74                        | 1704.73                      |
| PeIA-5712               | 22.4                 | 19      | 99       | 1763.79                        | 1763.78                      |

<sup>a</sup>MALDI-TOF mass spectrometry was used to determine the masses of all peptides.
